# Supplementary material for: Combinatorial recognition of a complex telomere repeat sequence by the Candida parapsilosis Cdc13AB heterodimer
Source: PubMed Central journal article supplement (PMC4344524; doi:10.1093/nar/gkv092), 2015-02-08
Supplement: supp_gkv092_Supp_data_all_V2.pdf [file supp_gkv092_Supp_data_all_V2.pdf]

## **Supplementary Data**

Steinberg-Neifach et al.

**Fig. S1**

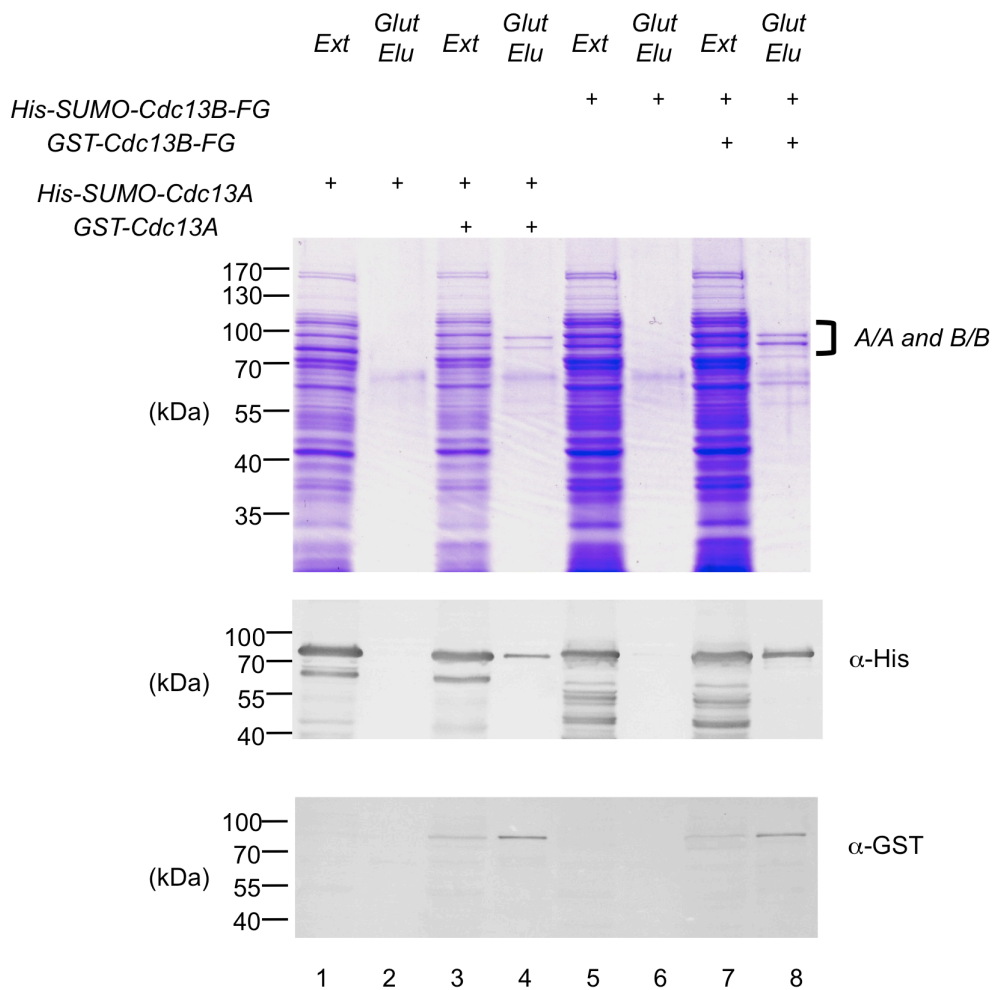

**Fig. S1. Self-association by CpCdc13A and CpCdc13B**

The indicated fusion proteins were expressed alone or co-expressed in *E. coli*, and the extracts were subjected to Glutathione-Sepharose affinity chromatography. The protein contents of the cell extracts (Ext) and Glutathione elution (Glut Elu) fractions were analyzed by SDS-PAGE and Coomassie staining. The levels of the His<sub>6</sub>-SUMO fusion proteins (the target protein) and the GST-FLAG fusion proteins (the bait protein) in the indicated cell extracts and elution fractions were also analyzed by Western using anti-His<sub>6</sub> and anti-GST antibodies.

**Fig. S2**

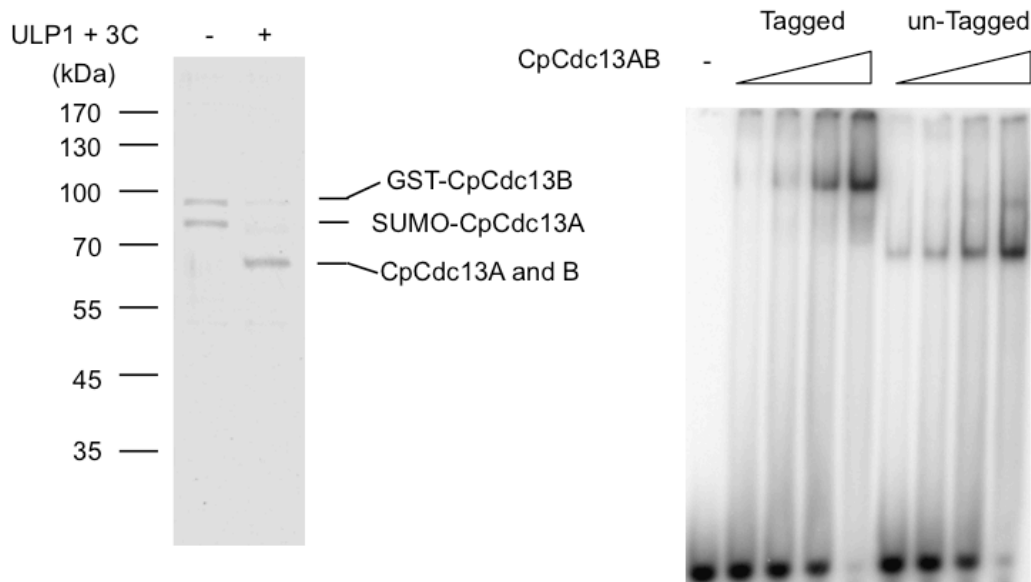

**Fig. S2. Comparison of the G-strand binding activity of the CpCdc13AB dimer before and after tag removal**

(Left) SDS-PAGE and Coomassie staining of the CpCdc13AB dimer before and after combined ULP1 and 3C treatment. Note that the untagged Cdc13A (52.7 kD) and Cdc13B (53.4 kD) migrate to the same position in the gel. Both proteins are quite acidic, with pIs round 5.0, which may explain their anomalously slow migration in the gel.

(Right) The CpG1 probe (7.5 nM) was incubated with increasing concentrations of tagged or untagged CpCdc13AB (5, 10, and 20 nM) and complex formation was monitored by native gel electrophoresis.

**Fig. S3**

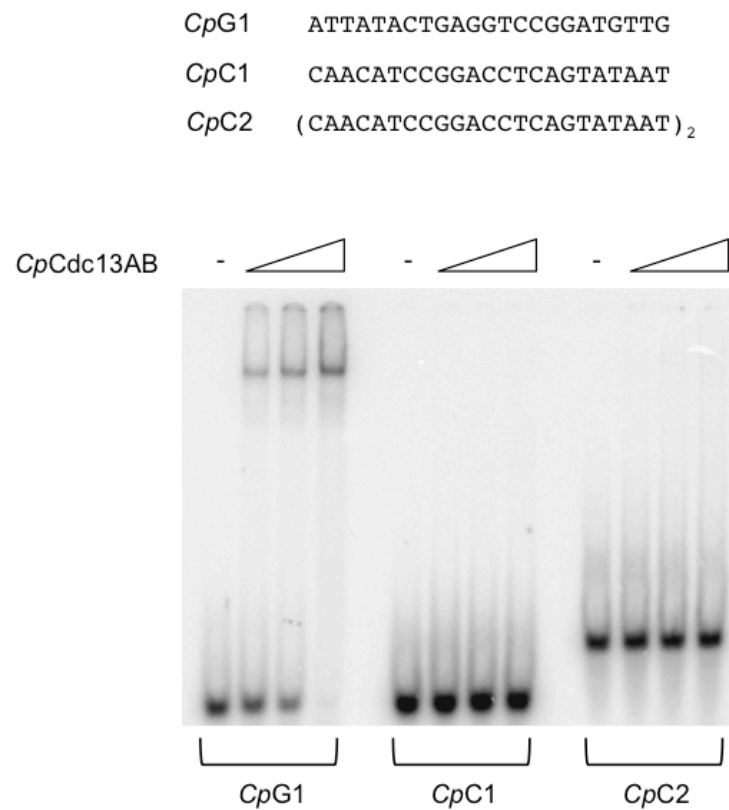

**Fig. S3. Comparison of the G-strand and C-strand binding activity of the CpCdc13AB dimer**

(Top) The sequences of the oligonucleotide probes used this series of gel mobility shift assays are listed.

(Bottom) The indicated probes (7.5 nM) were mixed with increasing concentrations of CpCdc13AB (5, 10, and 20 nM) and complex formation was monitored by native gel electrophoresis.

**Fig. S4**

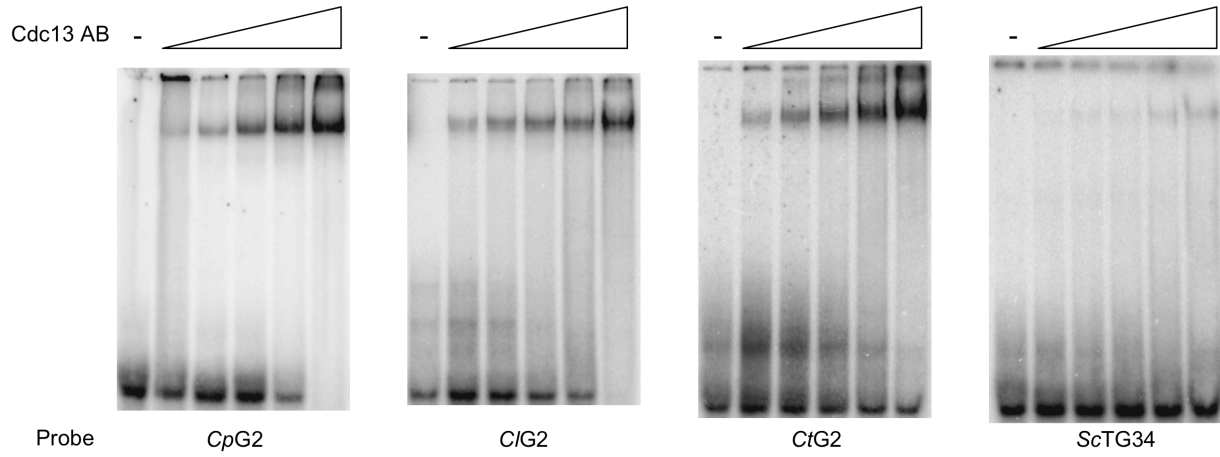

**Fig. S4. The binding of the CpCdc13AB complex to the cognate and heterologous telomere oligonucleotide**

The interaction between CpCdc13AB (0, 2.5, 5, 10, 20, 40 nM) and the indicated G-strand oligonucleotides (15 nM) was examined by gel mobility shift assays.

**Fig. S5**

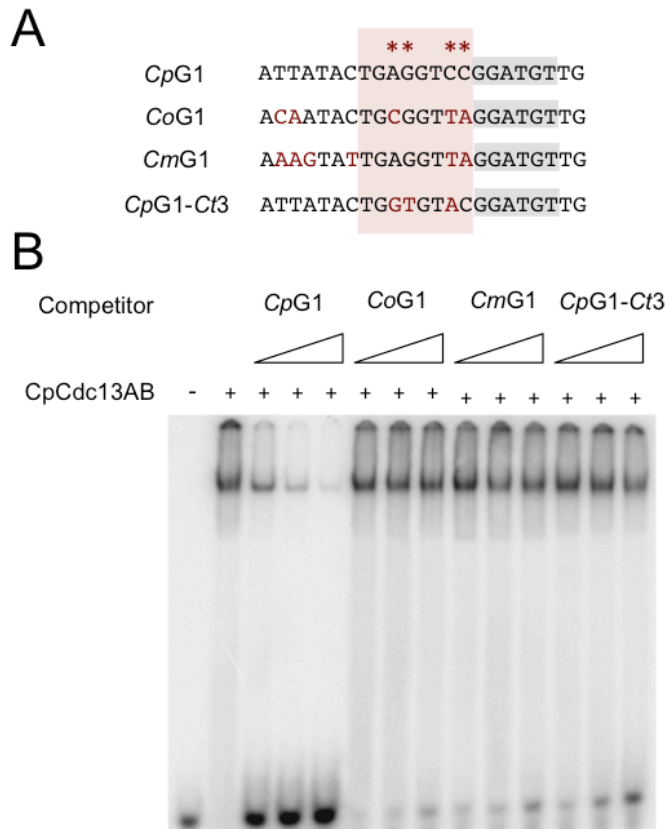

**Fig. S5. Binding of *CpCdc13AB* to heterologous G-strand repeats**

(A) The oligonucleotides used in these assays are displayed. *CoG1* and *CmG1* correspond to one G-strand repeat unit of *Candida orthopsilosis* and *Candida metapsilosis* telomeres, respectively. The putative target site for *CpCdc13B* is indicated by a light red shaded box, and the positions in the heterologous oligos that differ from the *Cp* G-strand are highlighted in dark red. The four positions that are likely to be recognized by *CpCdc13B* in a sequence-specific fashion are marked by asterisks.

(B) The interaction between the *CpG1* probe (7.5 nM) and the *CpCdc13AB* complex (10 nM) was assessed in gel mobility shift assays. Unlabeled *CpG1* and three variant oligos were added to the assays as competitors. The competitor oligos were included at 23, 75, and 225 nM.

**Fig. S6**

**A**

CpG1                    ATTATACTGAGGTCCGGATGTTG

CpG1-*i*1                    TACTGAGGTCCAGGATGTTG

CpG1-*i*2                    TACTGAGGTCCACACACGGATGTTG

CpG1-*i*3                    TACTGAGGTCCACACACACACGGATGTTG

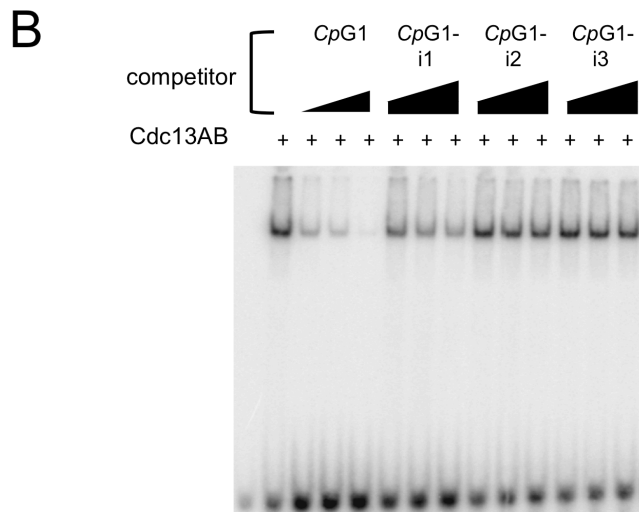

**Fig. S6. The effect of nucleotide insertions in the DNA substrate on binding by CpCdc13AB**

(A) The insertion oligonucleotides used in these assays are displayed.

(B) The interaction between the CpG1 probe (7.5 nM) and the CpCdc13AB complex (10 nM) was assessed in gel mobility shift assays. Unlabeled CpG1 and three insertion oligos were added to the assays as competitors. CpG1 was included at 23, 75, and 225 nM, and the insertion oligos were included at 75, 225, and 750 nM.

**Fig. S7**

**A**

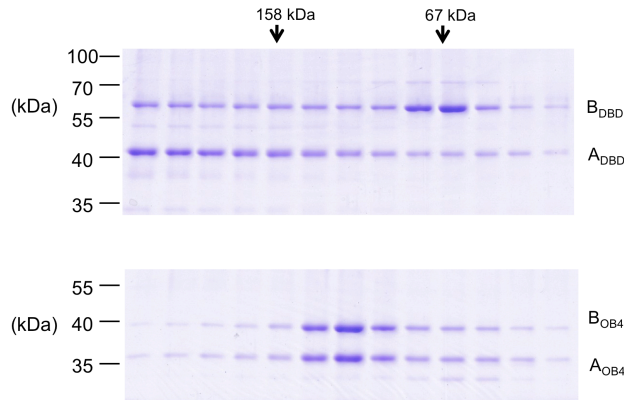

**B**

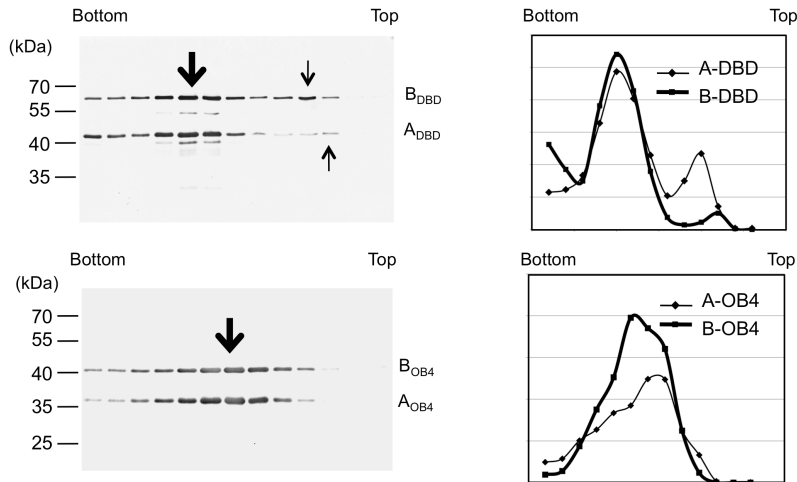

**Fig. S7. The sedimentation behaviors of the AB<sub>DBD</sub> and AB<sub>OB4</sub> complexes**

(A) (Top) The AB<sub>DBD</sub> complex purified by FLAG affinity chromatography was fractionated through a glycerol gradient. The distributions of A<sub>DBD</sub> and B<sub>DBD</sub> in the fractions were analyzed by SDS-PAGE and Coomassie staining. The arrows indicate the positions of the BSA (67 kDa) and aldolase (158 kDa) standards fractionated through a parallel gradient. (Bottom) The AB<sub>OB4</sub> complex purified by FLAG affinity chromatography was fractionated through a glycerol gradient. The distributions of A<sub>OB4</sub> and B<sub>OB4</sub> in the fractions were analyzed by SDS-PAGE and Coomassie staining.

(B) The fractions from the gradients shown in A that correspond to the AB<sub>DBD</sub> and AB<sub>OB4</sub> complexes (marked by open arrowheads) were diluted two-fold in Buffer G-0 (50 mM Tris-HCl, pH 7.5, 150 mM NaCl, 2 mM DTT, 0.1 % triton X-100) and subjected to a second round of glycerol gradient fractionation. The distributions of individual subunits were determined by anti-His<sub>6</sub> and anti-FLAG Western analysis, and the results plotted. Large and small arrows in the Western panels are used to indicate the positions of heterodimers and monomers, respectively.
